# Supplementary material
Source: PubMed Central journal article supplement (PMC3740482)
Supplement: supp_en.2012-2034_EN-12-2034_1Tab_2Figs.pdf [file supp_en.2012-2034_EN-12-2034_1Tab_2Figs.pdf]

| Gene                | Source       | Sequence                                                                          | Length (bases) |
|---------------------|--------------|-----------------------------------------------------------------------------------|----------------|
| Runx2               | NM_001145920 | Forward 5'-CGAGACCAACCGAGTCATTT-3'<br>Reverse 5'-ACGCCATAGTCCCTCCTTTT-3'          | 20<br>20       |
| Osterix             | NM_130458    | Forward 5'-TTTCTCATTAACCTCGTTGCCATCT-3'<br>Reverse 5'-CTTCGGGAAAACGGCAAATA-3'     | 24<br>20       |
| Collagen type1      | NM_007742    | Forward 5'-GCGAAGGCAACAGTCGCT-3'<br>Reverse 5'-CTTGGTGGTTTTGTATTCGATGAC-3'        | 18<br>24       |
| Osteocalcin         | NM_031368    | Forward 5'-CTGACCTCACAGATGCCAAG-3'<br>Reverse 5'-GTAGCGCCGGAGTCTGTTC-3'           | 20<br>19       |
| RANK                | NM_009399    | Forward 5'-GGCTTCTTCTCAGATGTCTTTTCG-3'<br>Reverse 5'-GGTGCAGTTGGTCCAAGGTT-3'      | 24<br>20       |
| RANKL               | NM_011613    | Forward 5'-TTGCACACCTCACCATCAAT-3'<br>Reverse 5'-TCCGTTGCTTAACGTCATGT-3'          | 20<br>20       |
| OPG                 | NM_008764    | Forward 5'-CAGAGACCAGGAAATGGTGAA-3'<br>Reverse 5'-AAGCTGCTCTGTGGTGAGGT-3'         | 21<br>20       |
| Calcitonin receptor | NM_001042725 | Forward 5'-TCCAGAGTGAAAAGGCGGAAT-3'<br>Reverse 5'-AACCTGTTCCACGAGAAGGAACCT-3'     | 21<br>23       |
| Apelin              | NM_013912    | Forward 5'-CCCCTTTTAAGTCCTTTGGCATCT-3'<br>Reverse 5'-CTCGCTAAAAAGTCCCGAAAGTAT-3'  | 24<br>24       |
| APJ                 | NM_011784    | Forward 5'-GTGCTCTGGACCGTGTTTC-3'<br>Reverse 5'-AGCTGAGCGTCTCTTTTCGC-3'           | 19<br>20       |
| PPAR gamma          | NM_001127330 | Forward 5'-TGTCTCACAATGCCATCAGGTT-3'<br>Reverse 5'-GCTGGTTCGATATCACTGGAGATC-3'    | 22<br>23       |
| CEBP alpha          | NM_007678    | Forward 5'-GGACCATTAGCCTTGTGTGTACTGTAT-3'<br>Reverse 5'-TGGATCGATTGTGCTTCAAGTT-3' | 27<br>22       |
| Gapdh               | NM_008084    | Forward 5'-TGCACCACCAACTGCTTAG-3'<br>Reverse 5'-GGATGCAGGGATGATGTTC-3'            | 19<br>19       |

**SUPPLEMENTAL TABLE 1.** The sequences of the primers used for RT-qPCR analysis.

**SUPPLEMENTAL FIGURE 1**

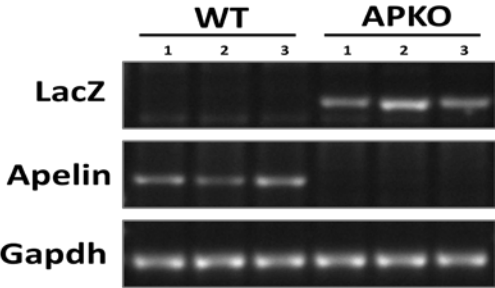

**SUPPLEMENTAL FIGURE 2**

A

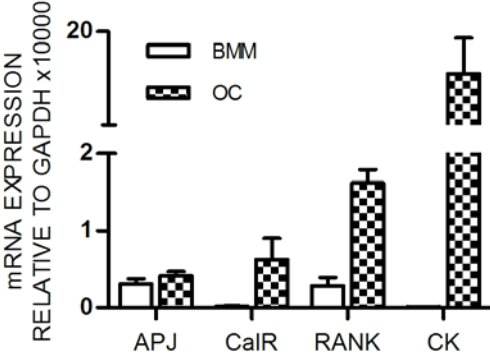

B

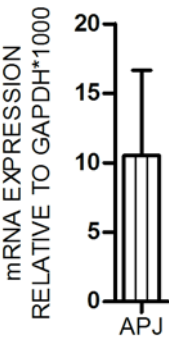

**EN-12-2034**

**SUPPLEMENTAL FIGURE 1.** Apelin and LacZ mRNA expression in 12-week-old tibias from APKO and WT mice assessed by RT-PCR (n = 3 per group). Gapdh expression was used as the internal control.

**SUPPLEMENTAL FIGURE 2.** A, Expression of APJ, calcitonin receptor (CalR), RANK and Cathepsin K (CK) in 129Sv/J osteoclasts. Gene expression was assessed by RT-qPCR. Bone marrow macrophage precursors were isolated from 129Sv/J mice and treated with M-CSF (20 ng/ml) alone (BMM) or M-CSF (10 ng/ml) and RANKL (60 ng/ml) to stimulate osteoclast differentiation (OC). In vitro derived osteoclasts express APJ, CalR, RANK and CK in a different level, whereas M-CSF-treated bone marrow macrophages only express APJ and RANK. B, Expression of APJ in primary calvarial osteoblasts assessed by RT-qPCR. Gapdh expression was used as the internal control. These data are representative of three experiments.
